# Supplementary material for: Real-time on-site detection of the three ‘Candidatus Liberibacter’ species associated with HLB disease: a rapid and validated method
Source: Front Plant Sci. 2023 Jun 7;14:1176513. doi: 10.3389/fpls.2023.1176513 (PMC10282772; doi:10.3389/fpls.2023.1176513)
Supplement: Supplementary file 1 [file DataSheet_1.docx]

Supplementary Material

Real-Time On-site Detection of the three `*Candidatus* Liberibacter´ Species associated with HLB disease: A Rapid and Validated Method

Félix Morán1, Mario Herrero-Cervera1, Sofía Carvajal-Rojas2 and Ester Marco-Noales*1

1Instituto Valenciano de Investigaciones Agrarias (IVIA). Centro de Protección Vegetal y Biotecnología. Unidad de Bacteriología.

2Universidad de Costa Rica (UCR). Centro de Investigación en Biología Celular y Molecular (CIBCM). Laboratorio de Fitopatógenos Obligados y sus Vectores (LaFOV).

***Correspondence:**marco_est@gva.es

# Supplementary Data

Sequences of synthetic gBlocks which contain a partial sequence (223 bp) of the *fusA* gene from species `*Candidatus* Liberibacter asiaticus´ (CaLas), `*Candidatus* Liberibacter africanus´ (CaLaf) and `*Candidatus* Liberibacter americanus´ (CaLam) used on analytical sensitivity evaluation of the new real-time RPA developed.

> CaLaf_fusA_RPA

AGAAATCATTTCAACAGAACGATAAAAGTCCGCGCCCATCTTATCCATTTTATTGCAAAATATCACGCGCGGAGTAGAATACTTGTTCGCCTGACGCCATACCGTTTCTGTTTGAGGTTCAACACCAGCATTAGCATCTAACAATGTTATCGCACCATCCGAAACACGAATAGAACGTTCTACTTCCATAGTAAAGTCAACGTGTCCAGGAGTATCAATAATT

> CaLas_fusA_RPA

AGAAATCATCTCAACAGAACGATAAAAATCCGCACCCATCTTATCCATTTTATTGCAAAATATCACACGCGGAACAGAATACTTATCAGCCTGACGCCATACCGTTTCTGTTTGCGGTTCAACACCAGCGTTAGAATCTAATAACGCTATCGCCCCATCCGTAACACGAATAGAACGCTCAACTTCCATAGTAAAATCAACATGCCCAGGAGTATCAATAATT

> CaLam_fusA_RPA

AGAAATCATTTCAACAGATCGATAAAAATCAGCGCCCAGTTTATCCATCTTATTACAAAAGATCATACGAGGAACAGAGTATTTATCCGCCTGACGCCATACAGTCTCTGTTTGAGGCTCAACCCCAGCATTAGAATCCAAAAGAGCAATAGCGCCATCCAAAACCCGAATGGAACGCTCAACTTCCATAGTAAAATCAACGTGACCAGGGGTATCAATAATA

# Supplementary Figures and Tables

## Supplementary Tables

**Table S1.** Analytical specificity, selectivity and limit of detection results in samples naturally infected analysed by real time PCR (de Chaves et al., 2023) and real-time RPA

| **Bacterial specieidentified1** | **Sample ID or Strain ID** | **Host** | **Country** | **Region** | **Quantification by**  **real-time PCR2** | **Real-time RPA** |
| --- | --- | --- | --- | --- | --- | --- |
| CaLas | 4119 | *Citrus sinensis*  cv. Valencia | Brazil | San Paulo | 2.39 x 103 | +++ |
| 4123 | 5.38 x 103 | +++**3** |
| 4127 | 4.69 x 104 | +++**3** |
| 4217 | 6.11 x 102 | +++**3** |
| 4224 | 5.52 x 103 | +++**3** |
| 4226 | 3.49 x 104 | +++ |
| 4227 | 4.37 x 104 | ++- |
| 4233 | 6.86 x 102 | +++ |
| 4257 | 6.12 x 104 | +++**3** |
| 4258 | 7.71 x 104 | +++**3** |
| 4259 | 6.12 x 104 | +++ |
| CaLam | Lam 31 | 5.13 x 102 | +++**3** |
| Lam 33 | 3.53 x 103 | +++**3** |
| CaLas | 4324 | Paraná | 7.30 | --- |
| 4327 | 1.38 x 103 | +++**3** |
| 4425 | 4.31 | --- |
| 4432 | 7.12 x 101 | ++- |
| 4447 | 4.56 x 101 | ++- |
| 4448 | 6.12 x 101 | ++- |
| 4449 | 6.32 | --- |
| 4450 | 4.46 x 101 | ++- |
| 4452 | 1.82 x 101 | +++ |
| 4453 | 2.23 | +-- |
| 4456 | 4.90 x 101 | ++- |
| 4528 | 5.50 | --- |
| 4535 | 5.52 x 103 | +++**3** |
| 4537 | 1.22 x 104 | +++**3** |
| 123 | *Citrus sinensis*  cv. Valencia | Costa Rica | Alajuela | 7.67 x 102 | +++**3** |
| 124 | 2.31 x 103 | +++**3** |
| 141 | 1.78 x 104 | +++**3** |
| No-CaLspp | Cs-1 | *Citrus sinensis*  cv. Lane late | Spain | Valencia | - | --- |
| Cs-2 | - | --- |
| Cs-3 | - | --- |
| Cs-4 | *Citrus clementina*  cv. Clemenules | - | --- |
| Cs-5 | - | --- |
| Cc-1 | - | --- |
| Cc-2 | - | --- |
| Cc-3 | - | --- |
| Cl-1 | *Citrus limon*  cv. Fino mesero | - | --- |
| 11661-3 | *Diaphorina citri* | US | Florida | - | --- |
| CaLas | 11661-2 | 4.61 x 101 | ++- |
| 11661-1 | 2.73 x 101 | ++- |
| 11661-4 | 1.17 x 102 | +++ |
| 11661-5 | 4.70 x 102 | +++ |
| 11661-6 | 7.64 | +-- |
| 11661-7 | 4,37 x 106 | +++**3** |
| 11661-14 | 6.86 x 104 | +++ |
| 11661-17 | 2.59 x 104 | +++ |
| 11661-26 | 7.74 x 102 | +++ |
| 11662-1 | 6.23 x 104 | +++**3** |
| 11662-2 | 5.72 x 101 | ++- |
| 11662-3 | 5.04 x 101 | +++ |
| 11662-5 | 4.65 x 104 | +++**3** |
| 11662-4 | 4.60 x 101 | ++- |
| 11662-6 | 1.43 x 104 | +++**3** |
| 11662-7 | 1.16 x 104 | +++**3** |
| 11662-8 | 4.67 x 101 | ++- |
| 11662-9 | 3.77 x 105 | +++**3** |
| 11662-10 | 9.04 x 101 | +++ |
| 11662-11 | 2.08 x 101 | ++- |
| 11662-13 | 1.73 x 102 | +++ |
| 11662-14 | 3.76 x 103 | +++**3** |
| 11662-15 | 3.39 x 102 | +++ |
| 11662-17 | 1.86 x 104 | +++**3** |
| 11662-18 | 4.59 x 101 | ++- |
| 11662-19 | 8.68 x 101 | ++- |
| 11662-20 | 2.80 x 104 | +++**3** |
| 11662-21 | 5.75 x 105 | +++**3** |
| No-CaLspp | 11533-1 | *Trioza erytreae* | South Africa |  | - | ---- |
| 11533-2 | - | --- |
| 11533-3 | - | --- |
| 11533-4 | - | --- |
| 11533-5 | - | --- |
| 11533-6 | - | --- |
| 11533-7 | - | --- |
| 11533-8 | - | --- |
| 11533-9 | - | --- |
| 11533-10 | - | --- |
| CaLas | 12112.2 | Rusk citrange | Cuba | Artemisa | 6.19 | --- |
| 12112.1 | 1.13 x 101 | +--**3** |
| No-CaLspp | 12112.3 | *Citrus reshni* | - | --- |
| CaLas | 12112.4 | *Citrus hystrix* | 8.37 x 104 | +++ |
| 12112.5 | 1.62 x 105 | +++**3** |
| 12112.6 | 2.6 x106 | +++ |
| No-CaLspp | 12112.7 | *Diaphorina citri* | - | --- |
| 12112.12 | - | --- |
| 12112.14 | - | --- |
| 12112.19 | - | --- |
| 12112.21 | - | --- |
| CaLas | 12112.8 | 4.77 x 105 | +++**3** |
| 12112.13 | 5.41 | --- |
| 12112.9 | 7.23 x101 | ++-**3** |
| 12112.15 | 7.99 x 101 | +--**3** |
| 12112.16 | 4.31 | +--**3** |
| 12112.17 | 1.37 x 101 | ++-**3** |
| 12112.18 | 3.48 | --- |
| 12112.10 | 2.45 x 101 | +++**3** |
| 12112.20 | 3.58 | --- |
| 12112.11 | 1.08 x 101 | ++- |
| CaLaf | Laf-10 | *Citrus* spp. | INRAE collection | | 5.57 x 103 | +++**3** |
| Laf-2 | 3,34 x 104 | +++**3** |
| Laf-3 | 2.78 x 103 | +++**3** |
| No-CaLspp | 12528-1 | *Trioza erytreae* | Spain | Vigo | - | --- |
| 12528-2 | - | --- |
| 12528-3 | - | --- |
| 12528-4 | - | --- |
| 12528-5 | - | --- |
| 12528-6 | - | --- |
| 12528-7 | - | --- |
| 12528-8 | - | --- |
| 12528-9 | - | --- |
| 12528-10 | - | --- |
| 12528-11 | - | --- |
| 12528-12 | - | --- |
| 12528-13 | - | --- |
| 12528-14 | - | --- |
| 12528-15 | - | --- |
| 12528-16 | - | --- |
| 12528-17 | - | --- |
| 12528-18 | - | --- |
| 12528-19 | - | --- |
| 12528-20 | - | --- |
| 12528-21 | - | --- |
| 12528-22 | - | --- |
| 12528-23 | - | --- |
| 12528-24 | - | --- |
| 12528-25 | - | --- |
| 12528-26 | - | --- |
| 12528-27 | - | --- |
| 12528-28 | - | --- |
| 12528-29 | - | --- |
| `*Ca*. Liberibacter solanacearum´ | 579/22 | *Solanum tuberosum* | Salamanca | 1.98 x 106 | --- |
| CaLsol-Carrot | *Daucus carota* | Valencia | 3.45 x 106 | --- |
| *Liberibacter crescens* | BT-1 | *Carica pentagona* | Puerto Rico | - | - | --- |
| *Agrobacterium tumefaciens* | C58/ ATCC 33970 | *Prunus avium* | USA | New York | - | --- |
| *Agrobacterium vitis* | IVIA 339.26 | *Vitis vinifera* | Spain | Orense | - | --- |
| *Xylella fastidiosa subsp. pauca* | CFBP 8072 | *Coffea arabica* | Ecuador | Unknow | - | --- |
| *Xylella fastidiosa subsp. fastidiosa* | IVIA 5770 | *Vitis vinifera* | Spain | Mallorca | - | --- |
| *Xanthomonas citri subsp. citri* | CFBP 2911 | *Citrus* spp. | Pakistan | Unknow | - | --- |
| *Spiroplasma citri* | NCPPB 3095 | *Citrus* spp. | Unknow | Unknow | - | --- |
| *Pseudomonas syringae* pv.*syringae* | IVIA 2827 | *Citrus reticulata* | Spain | Huelva | - | --- |

**1** `*Candidatus* Liberibacter´ specie identification by 16S rRNA gene sequencing according to Moran et al., (2020)

**2** Absolute quantitation by real-time PCR according to de Chaves et al., (2023) with an efficiency > 95%

**3** Control samples selected for *in vitro* specificity evaluation bypartial sequencing of the *fusA* gene

## Supplementary Figures

**Supplementary Figure 1.** Agarose gel electrophoresis of conventional PCR products amplified with RPA primers (RPA-HLB-F2/ RPA-HLB-R2), of 35 control HLB- infected samples from citrus and in insect vectors. Lane and sample ID. **1:** 4123, **2:** 4127, **3:** 4217, **4:** 4224, **5:** 4257, **6:** 4258, **7:** Lam31, **8:** Lam33, **9:** 4327, **10:** 4535, **11:** 4537, **12:** 123, **13:** 124, **14:** 141, **15:** 11661-7, **16:** 11662-1, **17:** 11662-5, **18:** 11662-6, **19:** 11662-7, **20:** 11662-9, **21:** 11662-14, **22:** 11662-17, **23:** 11662-20, **24:** 11662-21, **25:** 12112.1, **26:** 12112.5, **27:** 12112.8, **28:** 12112.9, **29:** 12112.15, **30:** 12112.16, **31:** 12112.17, **32:** 12112.10, **33:** Laf-10, **34:** Laf-2, **35:** Laf-3, **36:** Positive amplification control (PAC), **37:** *Liberibacter crescens* (BT-1), **38:** *Agrobacterium tumefaciens* (C58), **39:** Positive isolation control (PIC), **40:** PAC, **41:** PAC, **42:** PAC, **43:** PAC, **44:** *Agrobacterium vitis* (IVIA 339.26), **45:** *Xylella fastidiosa* subsp. *pauca* (CFBP 8072), **46:** *Spiroplasma citri* (NCPPB 3095)*,* **47:** *Xanthomonas citri* subsp*. citri* (CFBP 2911) **48:** *Pseudomonas syringae* pv. *syringae* (IVIA 2827).

**A.**

**B.**

**Supplementary Figure 2.** Analytical sensitivity of the new real-time RPA protocol with ten-fold serial diluted extracts of HLB-infected samples from citrus (A) or insect (B). Dilutions were performed on healthy citrus or insect material, respectively.
